# Supplementary material
Source: Springer Nature journal article supplement (https://www.springermedizin.de/resource/supplementary/12936_2013_3074_MOESM5_ESM.pdf/9545252)

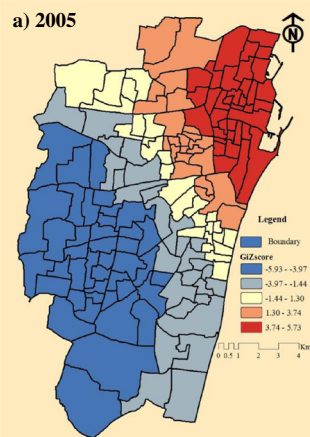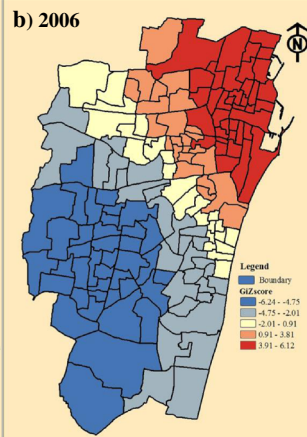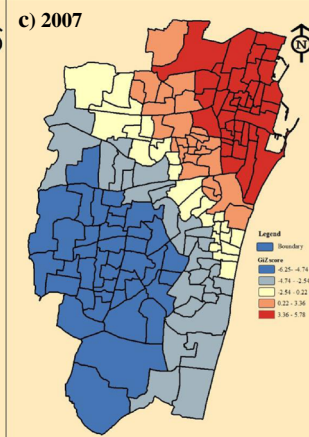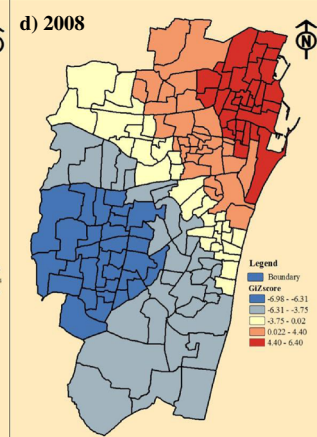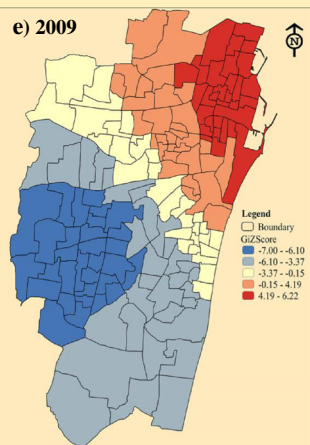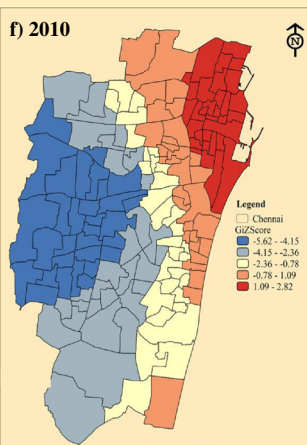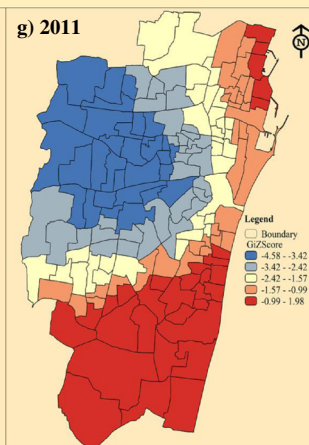

**Species:**  
*Plasmodium falciparum*  
*Plasmodium vivax*

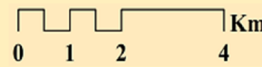

Source:Chennai Corporation

Supplement: MOESM5 [file 9545252]
